# Supplementary material for: Flow cytometry, cytology and histology in the diagnosis of ocular hematologic neoplasms: a 15-year monocentric experience with a focus on ocular lymphomas
Source: publisher site journal article supplement (doi:10.1515/cclm-2025-0216), 2025-10-09
Supplement: Supplementary file 1 [file j_cclm-2025-0216_suppl_001.docx]

**
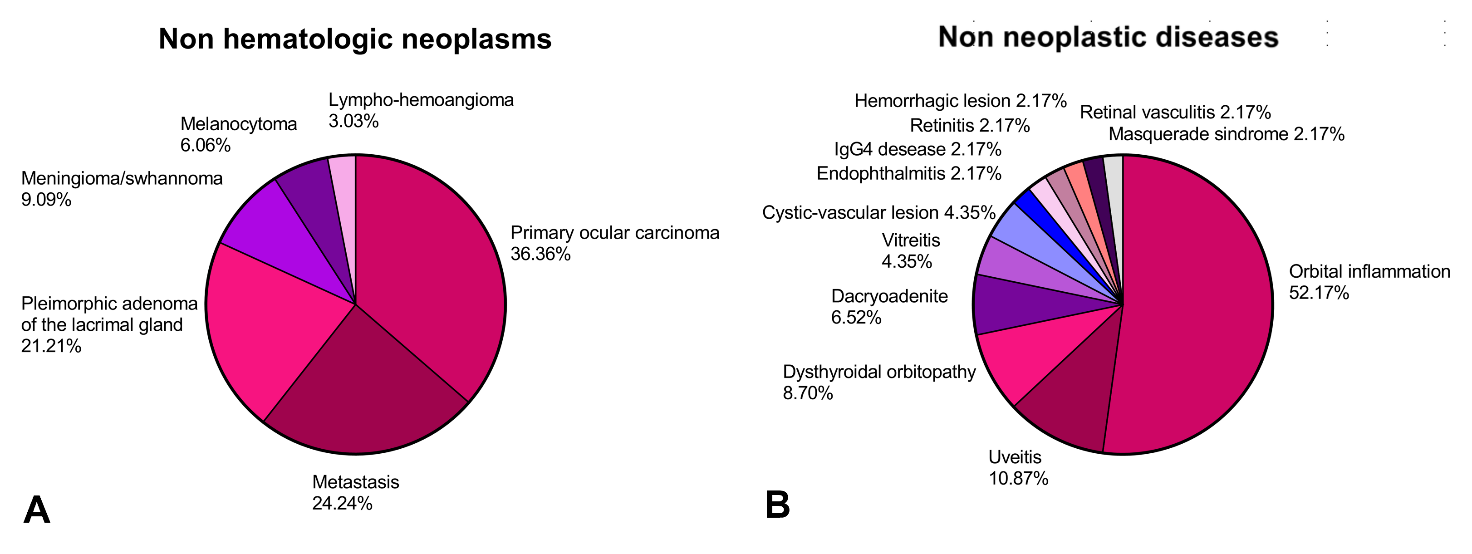
**

**Figure S1.** **Distribution of Non-Hematological Neoplasms and Non-Neoplastic Diseases.** Patients with non-hematological neoplasms included those with secondary metastases from lung, breast, or other solid cancers, as well as patients with primary carcinomas of the eye, primary adenomas of the lacrimal gland, meningiomas or schwannomas, melanocytomas, and lympho-hemangiomas. Patients with non-neoplastic diseases were affected by non-infectious and infectious uveitis, dysthyroid orbitopathies, sarcoidosis, and other related conditions.

|  | **Non neoplastic disease** | **Hematologic neoplasm** | | **Non hematologic neoplasm** |
| --- | --- | --- | --- | --- |
|  | **AOL** | **IOL** |
| **Eye (n, %)** |  |  |  |  |
| Right  Left | 24 (57.1)  18 (42.9) | 35 (47.3)  39 (52.7) | 4 (33.3)  8 (66.7) | 13 (40.6)  19 (59.4) |
| **Type of sample (%)** |  |  |  |  |
| Orbital/eyelid/conjunctival neoformation  Vitreous humor  Acqueos humor  Lacrimal gland | 40.9  15.9  11.4  31.8 | 73.0  0.0  0.0  27.0 | 0.0  58.3  41.7  0.0 | 56.7  0.0  10.0  33.3 |

**Table S1.** **Distribution of type-specimen for the three diagnostic groups.** This table shows the distribution of samples according to the groups of pathologies considered in the study and the frequency of individual lesion sites.
